# Supplementary material for: Comparison of the In Vitro and In Vivo Electrochemical Performance of Bionic Electrodes
Source: MDPI journal article supplement (doi:10.3390/mi13010103), 2022-01-09
Supplement: s1 [file s1]

Supplementary Material

# Comparison of *in vitro* and *in vivo* electrochemical performance of bionic electrodes

Alexander R. Harris<sup>1,2</sup>, Carrie Newbold<sup>2,3</sup>, Dimitra Stathopoulos<sup>2,3</sup>, Paul Carter<sup>4</sup>, Robert Cowan<sup>2,3</sup> and Gordon G. Wallace<sup>2,5</sup>

<sup>1</sup> Aikenhead Centre for Medical Discovery, ARC Centre of Excellence for Electromaterials Science, Faculty of Medicine, Dentistry and Health Sciences, University of Melbourne, Melbourne, Vic, 3010, Australia

<sup>2</sup> The HEARing CRC

<sup>3</sup> Department of Audiology & Speech Pathology, 550 Swanston St, University of Melbourne, Melbourne, 3010, Australia

<sup>4</sup> Cochlear Ltd, 1 University Ave, Macquarie University, NSW, 2109, Australia

<sup>5</sup> ARC Centre of Excellence for Electromaterials Science, Intelligent Polymer Research Institute, University of Wollongong, Wollongong, NSW, 2522, Australia

Email: alexrharris@gmail.com

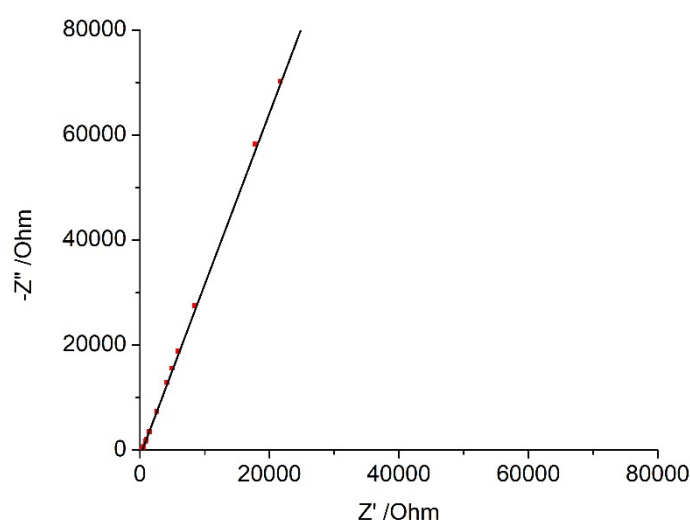

**Figure S1.** Typical Nyquist plot of a platinum cochlear implant electrode at 0 V with an AC amplitude of 10 mV after storage in saline over 8 weeks. Red – data, black line – fitting with equivalent circuit.

**Table S1.** Average, standard deviation and coefficient of variation of impedance (kOhm).

| Testing Conditions          |              |                  | Impedance 15 Hz |     |      | Impedance 1 kHz |      |      |
|-----------------------------|--------------|------------------|-----------------|-----|------|-----------------|------|------|
|                             | Location     | Time             | Ave             | SD  | CV   | Ave             | SD   | CV   |
| Initial                     | Saline       |                  | 293             | 159 | 0.54 | 8.1             | 4.6  | 0.57 |
| Implanted                   | Cochlea      | 1 day            | 140             | 65  | 0.47 | 6.1             | 1.9  | 0.31 |
| Implanted                   | Subcutaneous | 1 day            | 166             | 58  | 0.35 | 5.6             | 2.0  | 0.36 |
| Explanted                   | Saline       | 1 day            | 76              | 27  | 0.36 | 2.6             | 1.0  | 0.38 |
| Implanted                   | Cochlea      | 4 days           | 93              | 31  | 0.34 | 4.9             | 1.0  | 0.20 |
| Implanted                   | Cochlea      | 2 weeks          | 72              | 24  | 0.34 | 6.5             | 2.6  | 0.40 |
| Implanted                   | Cochlea      | 8 weeks          | 111             | 81  | 0.73 | 14.7            | 5.0  | 0.34 |
| Implanted                   | Subcutaneous | 4 days           | 68              | 30  | 0.45 | 3.2             | 1.2  | 0.37 |
| Implanted                   | Subcutaneous | 2 weeks          | 69              | 36  | 0.53 | 3.9             | 3.0  | 0.75 |
| Implanted                   | Subcutaneous | 8 weeks          | 67              | 9   | 0.14 | 4.1             | 0.2  | 0.06 |
| Explanted                   | Saline       | 4 days - 8 weeks | 53              | 20  | 0.38 | 1.8             | 0.7  | 0.40 |
| Initial                     | Saline       |                  | 431             | 44  | 0.10 | 11.2            | 1.3  | 0.11 |
| Stored                      | Saline       | 2 weeks          | 67              | 16  | 0.24 | 2.5             | 0.7  | 0.27 |
| Stored                      | Saline       | 8 weeks          | 55              | 11  | 0.19 | 2.0             | 0.2  | 0.08 |
| Initial                     | Saline       |                  | 215             | 192 | 0.89 | 11.1            | 10.0 | 0.91 |
| After 1 Voltammetric Cycle  | Saline       |                  | 47              | 2   | 0.04 | 3.2             | 0.6  | 0.18 |
| After 2 Voltammetric Cycles | Saline       |                  | 41              | 1   | 0.02 | 2.8             | 0.4  | 0.15 |
| After 3 Voltammetric Cycles | Saline       |                  | 37              | 2   | 0.06 | 2.8             | 0.4  | 0.15 |

**Table S2.** Electrochemical impedance parameters from equivalent circuit fitting of cochlear implant electrodes.

| Testing Conditions          |              |                  | Solution Resistance /Ohm |      |      | $Q_0 / 10^{-9} \text{ S s}^{1/2}$ |      |      | $n$  |      |
|-----------------------------|--------------|------------------|--------------------------|------|------|-----------------------------------|------|------|------|------|
|                             | Location     | Time             | Ave                      | SD   | CV   | Ave                               | SD   | CV   | Ave  | SD   |
| Initial                     | Saline       |                  | 322                      | 54   | 0.16 | 112                               | 123  | 1.10 | 0.85 | 0.03 |
| Implanted                   | Cochlea      | 1 day            | 2190                     | 455  | 0.21 | 1350                              | 7190 | 5.31 | 0.78 | 0.07 |
| Implanted                   | Subcutaneous | 1 day            | 1330                     | 333  | 0.25 | 218                               | 193  | 0.88 | 0.80 | 0.03 |
| Explanted                   | Saline       | 1 day            | 353                      | 74   | 0.21 | 421                               | 288  | 0.68 | 0.81 | 0.04 |
| Implanted                   | Cochlea      | 4 days           | 2630                     | 655  | 0.25 | 381                               | 191  | 0.50 | 0.78 | 0.04 |
| Implanted                   | Cochlea      | 2 weeks          | 3860                     | 1580 | 0.41 | 606                               | 383  | 0.63 | 0.74 | 0.08 |
| Implanted                   | Cochlea      | 8 weeks          | 3720                     | 2310 | 0.62 | 1430                              | 702  | 0.49 | 0.50 | 0.08 |
| Implanted                   | Subcutaneous | 4 days           | 1180                     | 300  | 0.25 | 554                               | 270  | 0.49 | 0.77 | 0.01 |
| Implanted                   | Subcutaneous | 2 weeks          | 1430                     | 780  | 0.55 | 695                               | 319  | 0.46 | 0.75 | 0.09 |
| Implanted                   | Subcutaneous | 8 weeks          | 1410                     | 330  | 0.3  | 623                               | 98   | 0.16 | 0.71 | 0.00 |
| Explanted                   | Saline       | 4 days - 8 weeks | 354                      | 68   | 0.19 | 607                               | 390  | 0.64 | 0.81 | 0.03 |
| Initial                     | Saline       |                  | 364                      | 21   | 0.06 | 46                                | 6    | 0.14 | 0.87 | 0.01 |
| Stored                      | Saline       | 2 weeks          | 357                      | 108  | 0.30 | 434                               | 116  | 0.27 | 0.79 | 0.01 |
| Stored                      | Saline       | 8 weeks          | 341                      | 23   | 0.07 | 513                               | 109  | 0.21 | 0.80 | 0.02 |
| Initial                     | Saline       |                  | 710                      | 143  | 0.20 | 286                               | 245  | 0.86 | 0.72 | 0.01 |
| After 1 Voltammetric Cycle  | Saline       |                  | 702                      | 12   | 0.02 | 990                               | 125  | 0.13 | 0.68 | 0.04 |
| After 2 Voltammetric Cycles | Saline       |                  | 679                      | 16   | 0.02 | 1260                              | 143  | 0.11 | 0.66 | 0.05 |
| After 3 Voltammetric Cycles | Saline       |                  | 673                      | 11   | 0.02 | 1330                              | 79   | 0.06 | 0.66 | 0.03 |

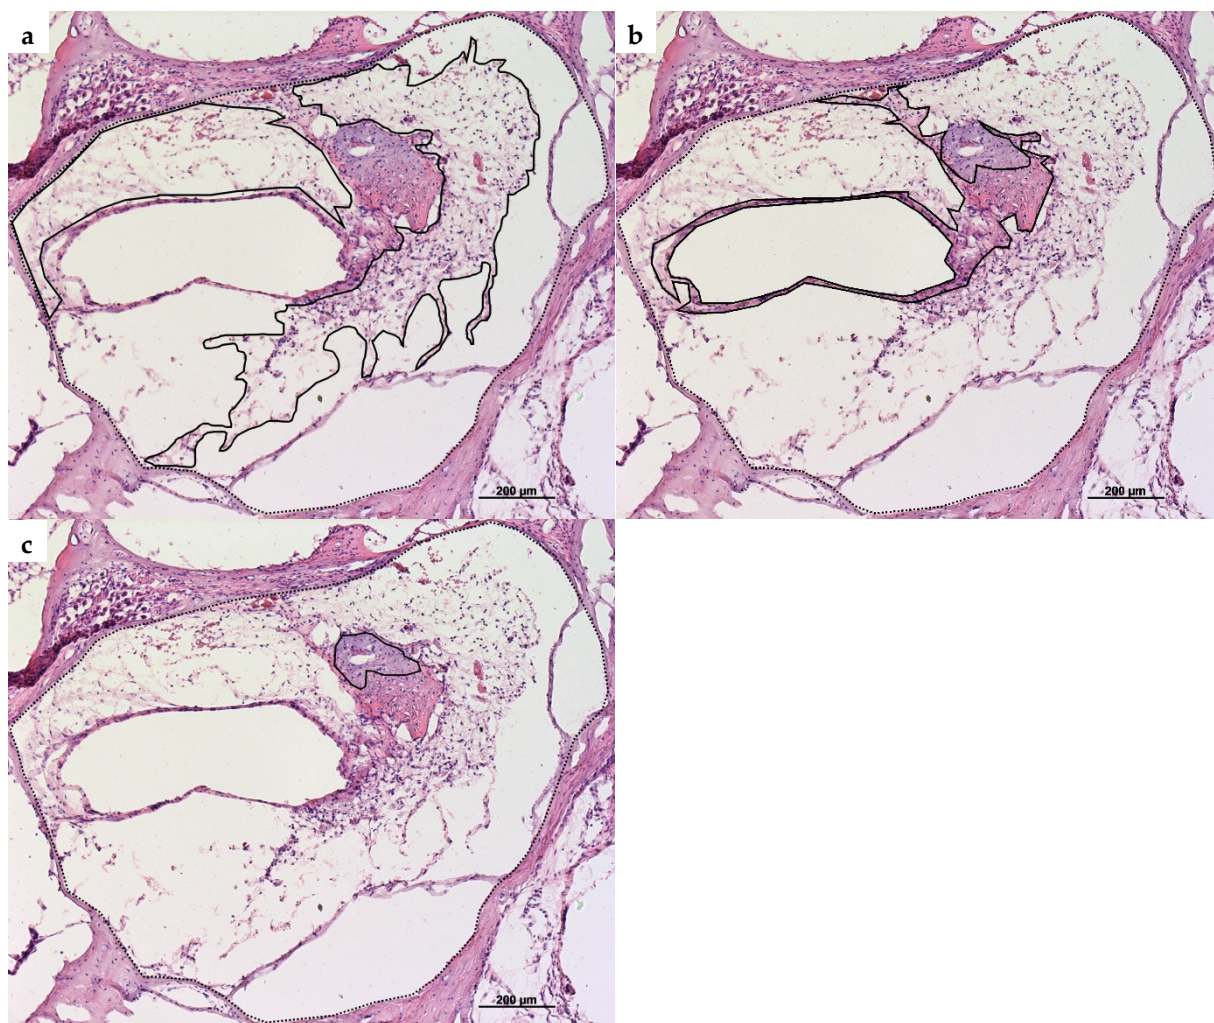

**Figure S2.** Optical micrograph of a stained section of cochlea after 8 weeks implantation. Dotted line defines scala tympani, solid line defines (a) loose fibrous tissue, (b) dense fibrous tissue (c) new bone formation.
